# Supplementary material for: Histological and transcriptional characterization of the pancreatic acinar tissue in type 1 diabetes
Source: PubMed Central journal article supplement (PMC8149357; doi:10.1136/bmjdrc-2020-002076), 2021-05-23
Supplement: bmjdrc-2020-002076supp001.pdf [file bmjdrc-2020-002076supp001.pdf]

## Supplemental Material

Table S1. Antibodies used for immunohistochemistry (IHC) and immunofluorescence (IF). \*Concentration used for triple staining with insulin, somatostatin and glucagon. †Concentration used for double staining with amylase and glucagon.

| Antibody             | Catalog #           | Company           | Concentration |            |              | Antigen Retrieval | Incubation Time |
|----------------------|---------------------|-------------------|---------------|------------|--------------|-------------------|-----------------|
|                      |                     |                   | IHC FFPE      | IHC frozen | IF           |                   |                 |
| <b>Insulin</b>       | 565689              | BD Biosciences    | -             | -          | 1:100        | -                 | 1 h             |
| <b>Somatostatin</b>  | 566032              | BD Biosciences    | -             | -          | 1:100        | -                 | 1 h             |
| <b>Glucagon</b>      | 565891              | BD Biosciences    | -             | -          | 1:100*/1:50† | -                 | 1 h             |
| <b>Sytox Orange</b>  | S11368              | Life Technologies | -             | -          | 500 nM       | -                 | 10 min          |
| <b>Synaptophysin</b> | DAK-SYNAP           | Dako              | 1:100         | 1:140      | -            | pH 9              | 30 min          |
| <b>CD45</b>          | Clone 2B11 + PD7/26 | Dako              | -             | 1:75       | -            | -                 | 30 min          |
| <b>Amylase</b>       | AB21156             | Abcam             | 1:100         | -          | 1:50         | pH 6              | 30 min/1 h      |
| <b>Amylase</b>       | HPA045394-100UL     | Sigma             | 1:600         | -          | -            | pH 6              | 30 min          |
| <b>Amylase</b>       | LS-B12950-50        | LSBio             | 1:300         | -          | -            | pH 6              | 30 min          |
| <b>Trypsin</b>       | LS-B13760-200       | LSBio             | 1:100         | -          | -            | pH 6              | 30 min          |
| <b>Lipase</b>        | HPA062494-100UL     | Sigma             | 1:800         | -          | -            | pH 6              | 30 min          |
| <b>AF488</b>         | 10729174            | Fisher Scientific | -             | -          | 1:500        | -                 | 1 h             |

Table S2. Clinical characteristics of the donors that passed the screening. All islets in donors with type 1 diabetes were insulin negative. “INS pos cells in exocrine tissue” refer to scattered insulin-positive cells surrounded by exocrine tissue as detected by immunofluorescent staining. +: present, -: not present. NDs: Non-diabetic subjects, T1Ds: Type 1 diabetic subjects, Na: Not available. \* Biopsies used for LCM. †Biopsies used for IF stainings of amylase.

|                | Donor No. | Age            | Sex | BMI (kg/m <sup>2</sup> ) | HbA1c, % (mmol/mol) | Pancreas region frozen biopsies | Pancreas region FFPE biopsies | IA2A | GADA | INS pos cells in exocrine tissue | Nr of nuclei   |                | Cause of death                        |
|----------------|-----------|----------------|-----|--------------------------|---------------------|---------------------------------|-------------------------------|------|------|----------------------------------|----------------|----------------|---------------------------------------|
|                |           |                |     |                          |                     |                                 |                               |      |      |                                  | Exo 1          | Exo 3          |                                       |
| NDs            | ND-1      | 13             | M   | 16                       | 5.8, 40             | tail*, body†                    | tail                          | na   | na   | +                                | 864            | 774            | Cerebral anoxia due to cardiac arrest |
|                | ND-2      | 35             | F   | 24.7                     | na                  | body*, head†                    | tail                          | -    | -    | +                                | 1314           | 1014           | Hypoxemia due to cardiac arrest       |
|                | ND-3      | 57             | F   | 22.7                     | 6.3, 45             | tail*, body†                    | body                          | na   | na   | +                                | 1280           | 700            | Subarachnoid hemorrhage               |
|                | ND-4      | 45             | F   | 25.4                     | 5.7, 38.8           | tail*, tail†                    | head                          | -    | -    | +                                | 722            | 928            | Infarction in the cerebellum          |
|                | ND-5      | 21             | M   | 28                       | 5.7, 38.8           | tail*, tail†                    | head                          | -    | -    | +                                | 910            | 946            | Head trauma                           |
|                | ND-6      | 17             | F   | 28.9                     | na                  | body*, body†                    | tail                          | na   | na   | +                                | 1051           | 686            | Traumatic subarachnoid hemorrhage     |
|                | ND-7      | 63             | M   | 24                       | 5.8, 39.9           | tail*, head†                    | head                          | -    | -    | +                                | 896            | 825            | Subarachnoid hemorrhage               |
|                | ND-8      | 13             | M   | 19.7                     | 5.2, 33             | tail*, tail†                    | head                          | -    | -    | +                                | 883            | 828            | Strangulation                         |
| <b>Mean±SD</b> |           | <b>33±18.8</b> |     | <b>23.7±4</b>            |                     |                                 |                               |      |      |                                  | <b>990±196</b> | <b>838±110</b> |                                       |
| T1Ds           | T1D-1     | 16             | M   | 21.9                     | na                  | tail*, body†                    | head                          | na   | na   | +                                | 762            | 883            | Traumatic subarachnoid hemorrhage     |
|                | T1D-2     | 36             | F   | 20.9                     | 7.2, 55.2           | tail*, tail†                    | body                          | na   | na   | +                                | 461            | 624            | Intracranial hemorrhage               |
|                | T1D-3     | 60             | F   | 23.9                     | 8.2, 66.1           | tail*, tail†                    | head                          | +    | +    | -                                | 653            | 874            | Subarachnoid hemorrhage               |
|                | T1D-4     | 47             | F   | 27.6                     | 7.4, 57.4           | body*, body†                    | head                          | -    | -    | +                                | 415            | 509            | Cardiac arrest                        |
|                | T1D-5     | 24             | M   | 27.5                     | 8.3, 67.2           | tail*, tail†                    | head                          | +    | -    | -                                | 501            | 681            | Trauma                                |
|                | T1D-6     | 25             | F   | 26.7                     | 7.1, 54.1           | tail*, body†                    | tail                          | -    | -    | -                                | 925            | 675            | Cerebral edema due to hypoglycemia    |
|                | T1D-7     | 65             | M   | 24.2                     | na                  | tail*, tail†                    | body                          | na   | na   | -                                | 1243           | 985            | Trauma by fall                        |
| <b>Mean±SD</b> |           | <b>39±17.5</b> |     | <b>24.7±2.5</b>          |                     |                                 |                               |      |      |                                  | <b>709±275</b> | <b>747±157</b> |                                       |

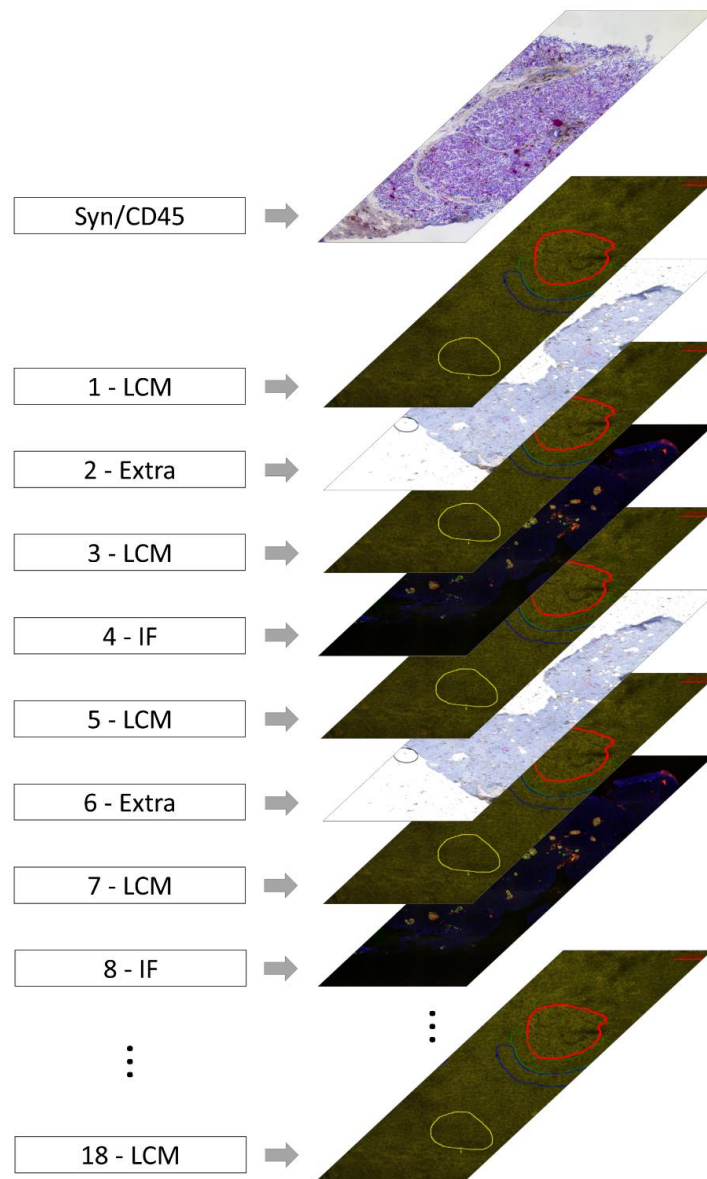

Figure S1. Strategy for consecutive sectioning prior to LCM. Frozen consecutive sections (10  $\mu$ m) were mounted on either Arcturus PEN membrane glass slides for LCM or glass slides. The sections on glass slides were used for IF staining of insulin, glucagon and somatostatin, or saved for future analysis. Syn/CD45: synaptophysin/CD45, LCM: Laser Capture Microdissection, IF: Immunofluorescence.

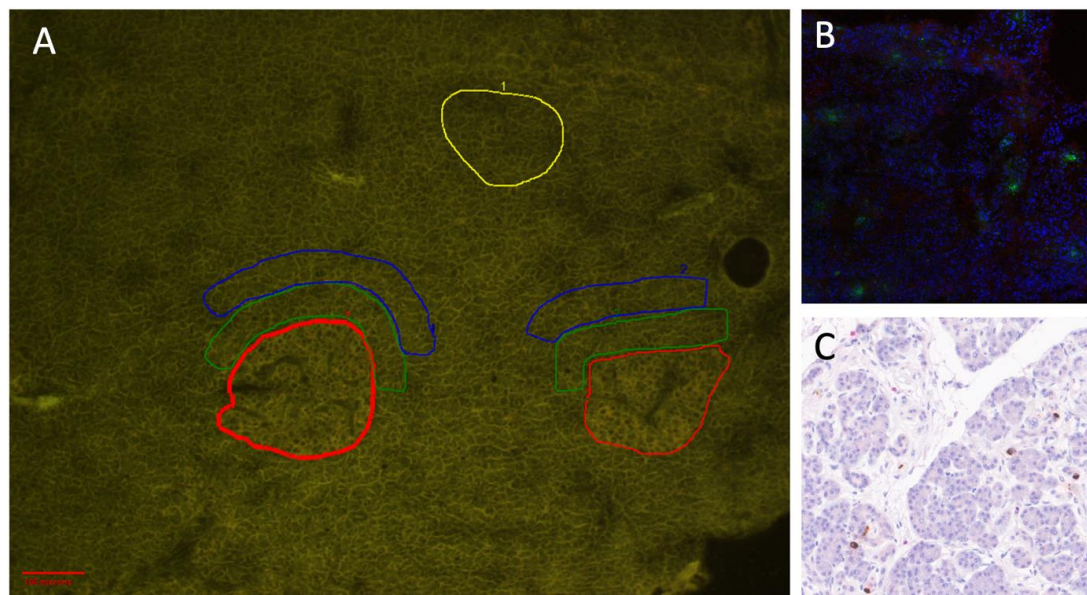

Figure S2. Auto-fluorescence of islets and marked regions before microdissection (A). All islets were insulin-negative but scattered insulin-positive cells were found within the pancreatic tissue as detected by immunofluorescence (B) and by immunohistochemistry (C). Immunohistochemistry sections were stained for insulin (guinea pig polyclonal anti-insulin, dilution 1:200, Agilent, cat: A0564) and counterstained with heamatoxylin using a standard protocol.

Red region: islets, green region: Exo1 (0-50 μm from islets), blue region: Exo2 (50-100 μm from islets) and yellow region: Exo3 (a minimum of 100 μm from islets).
